# Supplementary material for: Morphological controls on surface runoff: an interpretation of steady-state energy patterns, maximum power states and dissipation regimes within a thermodynamic framework
Source: Copernicus journal article supplement (doi:10.5194/hess-26-3125-2022), 2022-06-21
Supplement: Supplementary file 1 [file hess-26-3125-2022-supplement.zip]

Archive with 3 entries (3 files):
- hess-26-3125-2022-supplement-title-page.pdf
- supplemental_data_v0.csv
- README.pdf
