# Supplementary material for: Morphological controls on surface runoff: an interpretation of steady-state energy patterns, maximum power states and dissipation regimes within a thermodynamic framework
Source: Copernicus journal article supplement (doi:10.5194/hess-26-3125-2022), 2022-06-21
Supplement: Supplementary file 1 [file hess-26-3125-2022-supplement.zip › hess-26-3125-2022-supplement-title-page.pdf]

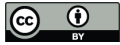

*Supplement of*

## **Morphological controls on surface runoff: an interpretation of steady-state energy patterns, maximum power states and dissipation regimes within a thermodynamic framework**

**Samuel Schroers et al.**

*Correspondence to:* Samuel Schroers ([samuel.schroers@kit.edu](mailto:samuel.schroers@kit.edu))

- [hess-26-3125-2022-supplement-title-page.pdf](#)
- [README.pdf](#)
- [supplemental\\_data\\_v0.csv](#)

The copyright of individual parts of the supplement might differ from the article licence.
