# Supplementary material for: Morphological controls on surface runoff: an interpretation of steady-state energy patterns, maximum power states and dissipation regimes within a thermodynamic framework
Source: Copernicus journal article supplement (doi:10.5194/hess-26-3125-2022), 2022-06-21
Supplement: Supplementary file 1 [file hess-26-3125-2022-supplement.zip › README.pdf]

### Supplemental material: Rainfall simulations experiments by Gerlinger (1996)

The csv file contains the following measured values (or previously calculated values) as well as numerically derived values (cf. main article).

| <b>symbol</b><br><b>(header)</b> | <b>unit</b>         | <b>description</b>                                            |                                      |
|----------------------------------|---------------------|---------------------------------------------------------------|--------------------------------------|
| <b><i>no</i></b>                 | -                   | Location identifier                                           | Measured values                      |
| <b><i>width</i></b>              | m                   | Width of experimental plot                                    |                                      |
| <b><i>length</i></b>             | m                   | Length of experimental plot                                   |                                      |
| <b><i>I</i></b>                  | mm h <sup>-1</sup>  | Steady rainfall rate                                          |                                      |
| <b><i>slope</i></b>              | m m <sup>-1</sup>   | Slope of experimental plot                                    |                                      |
| <b><i>n</i></b>                  | m <sup>-1/3</sup> s | Manning's n                                                   |                                      |
| <b><i>vrf_mess</i></b>           | m s <sup>-1</sup>   | Measured rill flow velocity                                   |                                      |
| <b><i>vsf_mess</i></b>           | m s <sup>-1</sup>   | Measured sheet flow velocity                                  |                                      |
| <b><i>d50</i></b>                | µm                  | Mean particle diameter of eroded top soil                     |                                      |
| <b><i>csed</i></b>               | kg m <sup>-3</sup>  | Steady state sediment concentration                           |                                      |
| <b><i>vrf_sim</i></b>            | m s <sup>-1</sup>   | Simulated rill flow velocity                                  | Derived values<br>(cf. main article) |
| <b><i>vsf_sim</i></b>            | m s <sup>-1</sup>   | Simulated sheet flow velocity                                 |                                      |
| <b><i>SS_Q</i></b>               | -                   | Index for steady state discharge: 1==yes; 0== no              |                                      |
| <b><i>SS_Csed</i></b>            | -                   | Index for steady state sediment concentration: 1==yes; 0== no |                                      |
| <b><i>CF</i></b>                 | -                   | Flow accumulation parameter for rill flow model (Catflow)     |                                      |
