# Supplementary material for: Morphological controls on surface runoff: an interpretation of steady-state energy patterns, maximum power states and dissipation regimes within a thermodynamic framework
Source: Copernicus journal article supplement (doi:10.5194/hess-26-3125-2022), 2022-06-21
Supplement: Supplementary file 1 [file hess-26-3125-2022-supplement.zip › supplemental_data_v0.csv]

	no	width	length	I	slope	n	vrf_mess	vsf_mess	d50	csed	vrf_sim	vsf_sim	SS_Q	SS_Csed	CF
0	fk1_1	2.0	12.0	62.4	0.138	0.027	0.246	0.152	33.015	69.366	0.237	0.147	1.0	0.0	0.01
1	fk1_2	2.0	12.0	62.4	0.172	0.022	0.221	0.171	29.387	63.879	0.218	0.178	1.0	0.0	0.006
2	fk1_3	2.0	12.0	62.4	0.117	0.021	0.247	0.165	31.176	67.618	0.248	0.161	1.0	0.0	0.007
3	fk3_1	2.0	12.0	62.4	0.121	0.024	0.175	0.156	35.261	74.786	0.177	0.159	1.0	1.0	0.003
4	lek_1	2.0	12.0	62.4	0.163	0.04	0.3	0.133	38.39	81.14	0.298	0.104	1.0	0.0	0.024
5	lek_2	2.0	12.0	62.4	0.163	0.045	0.239	0.122	34.339	53.066	0.24	0.106	1.0	1.0	0.018
6	oek2_1	2.0	12.0	60.3	0.094	0.018	0.183	0.18	26.525	27.28	0.181	0.167	1.0	0.0	0.002
7	oek2_2	2.0	12.0	63.3	0.139	0.04	0.2	0.118	21.947	42.702	0.203	0.106	1.0	0.0	0.011
8	oek2_31	2.0	12.0	34.4	0.137	0.04	0.141	0.115	24.97	19.683	0.141	0.082	1.0	1.0	0.01
9	oek2_32	2.0	12.0	62.4	0.137	0.03	0.195	0.141	24.97	48.84	0.197	0.13	0.0	1.0	0.008
10	oek2_33	2.0	12.0	44.6	0.137	0.039	0.159	0.1	24.97	35.92	0.157	0.091	1.0	1.0	0.01
11	oek2_4	2.0	12.0	62.4	0.151	0.032	0.15	0.142	30.6	108.89	0.149	0.139	1.0	0.0	0.0032
12	ok2_1	2.0	12.0	60.6	0.157	0.06	0.126	0.084	23.69	22.226	0.124	0.078	1.0	0.0	0.01
13	ok2_31	2.0	12.0	60.6	0.143	0.03	0.155	0.128	24.676	34.188	0.154	0.126	1.0	0.0	0.005
14	ok2_32	2.0	12.0	60.6	0.143	0.055	0.11	0.083	23.722	23.517	0.113	0.081	1.0	0.0	0.007
15	ok2_41	2.0	12.0	60.6	0.147	0.02	0.187	0.17	31.61	43.186	0.184	0.17	1.0	0.0	0.003
16	ok2_42	2.0	12.0	60.6	0.147	0.03	0.145	0.128	30.562	27.056	0.144	0.127	1.0	0.0	0.004
17	ok2_5	2.0	12.0	60.6	0.146	0.04	0.22	0.11	33.267	71.408	0.219	0.101	1.0	0.0	0.015
18	ok3_1	2.0	12.0	61.2	0.146	0.074	0.19	0.06	24.128	37.922	0.19	0.024	0.0	0.0	0.139
19	ok3_2	2.0	12.0	60.6	0.144	0.04	0.205	0.105	24.827	31.189	0.207	0.095	0.0	1.0	0.015
20	ok4_11	2.0	12.0	60.6	0.132	0.06	0.185	0.078	25.744	41.857	0.188	0.059	1.0	0.0	0.021
21	ok4_12	2.0	12.0	60.6	0.132	0.04	0.25	0.107	25.739	45.682	0.25	0.082	1.0	1.0	0.021
22	ok4_31	2.0	12.0	63.0	0.149	0.04	0.18	0.098	31.421	82.021	0.181	0.094	1.0	0.0	0.013
23	ok4_32	2.0	12.0	59.9	0.149	0.02	0.194	0.186	30.877	56.982	0.196	0.162	1.0	1.0	0.005
24	ok5_1	2.0	12.0	60.6	0.179	0.04	0.162	0.048	37.526	72.786	0.165	0.111	0.0	0.0	0.01
25	ok6_11	2.0	12.0	60.6	0.178	0.032	0.255	0.135	36.703	87.863	0.255	0.129	1.0	0.0	0.016
26	ok6_12	2.0	12.0	62.3	0.178	0.03	0.228	0.139	36.703	60.703	0.226	0.137	1.0	1.0	0.012
27	ok6_22	2.0	12.0	59.2	0.182	0.025	0.203	0.172	40.406	200.881	0.202	0.16	0.0	0.0	0.007
28	ok6_32	2.0	12.0	64.8	0.148	0.03	0.171	0.135	36.633	165.179	0.173	0.135	1.0	0.0	0.006
29	sk1_2	2.0	12.0	62.4	0.15	0.025	0.182	0.17	41.291	134.24	0.179	0.167	1.0	0.0	0.003
30	sk2_2	2.0	12.0	62.4	0.168	0.025	0.193	0.165	67.628	98.487	0.192	0.084	1.0	0.0	0.019
